# Supplementary material
Source: PubMed Central journal article supplement (PMC2848110)
Supplement: jcs.056549_1.pdf [file jcs.056549_1.pdf]

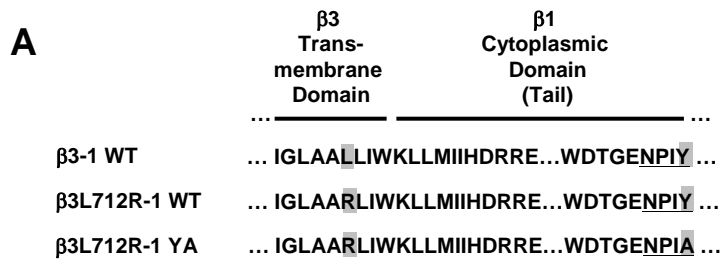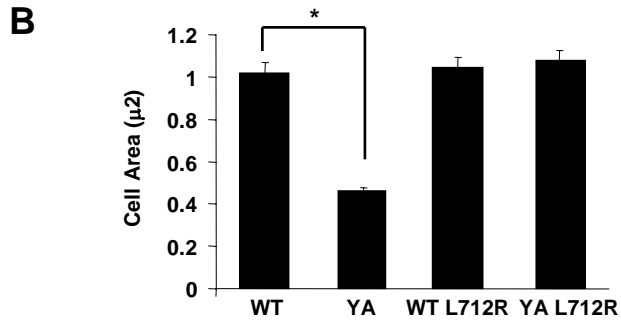

**Fig. S1. An activating mutation within the β3-1A YA transmembrane region (L712R) restores cell spreading.** (A) Shown are the sequences from the WT and YA β3-1A integrin subunits containing a leucine to arginine substitution (L712R). (B) CHO K1 cells were transiently transfected with expression vectors for the indicated subunits: WT (αIIb-5 & β3-1A WT); YA (αIIb-5 & β3-1A YA); WT L712R (αIIb-5 & β3L712R-1A WT); and YA L712R (αIIb-5 & β3L712R-1A YA). Cells were then adhered to fibrinogen for 1 hour in CCM1 and assayed for spreading. Plotted is the average cell area ± s.d. from 3 independent experiments, n=150. (\*) p<0.05.
