# Supplementary material
Source: PubMed Central journal article supplement (PMC2848110)
Supplement: jcs.056549_2.pdf [file jcs.056549_2.pdf]

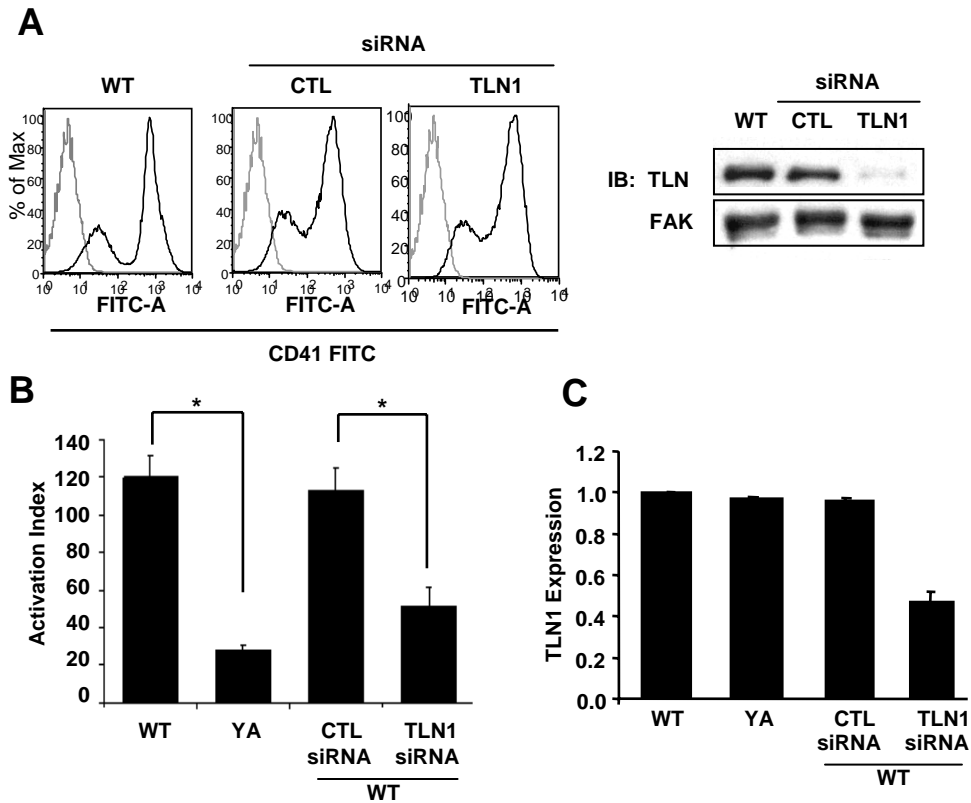

**Fig. S2. Talin1 knockdown inhibits integrin activation.** (A) Cells expressing the WT integrin were left untreated or transfected with control or talin siRNA. The surface expression of integrins was detected with an antibody to CD41 (FITC). FACS analysis indicated that recombinant integrin expression is not altered by inhibiting the expression of talin. Talin1 knockdown was confirmed by western blot. (B-C) Cells stably expressing the WT or YA mutant integrin were transfected with a GFP expression vector alone or together with either the control or talin#1 siRNA as indicated. Aliquots of transfected cells were used to confirm talin1 knockdown and activation. (B) Cells were incubated with the ligand mimetic PAC1 antibody. PAC1 binding was analyzed by FACS, and the activation index was calculated as described in Materials and Methods. Plotted is the average activation index  $\pm$  s.d. from the 3 independent experiments. (\*)  $p < 0.05$ . (C) Plotted is the average expression levels of talin1  $\pm$  s.d. from the 3 independent experiments shown in B. Similar results were obtained using talin siRNA #2.
