# Supplementary material
Source: PubMed Central journal article supplement (PMC2848110)
Supplement: jcs.056549_3.pdf [file jcs.056549_3.pdf]

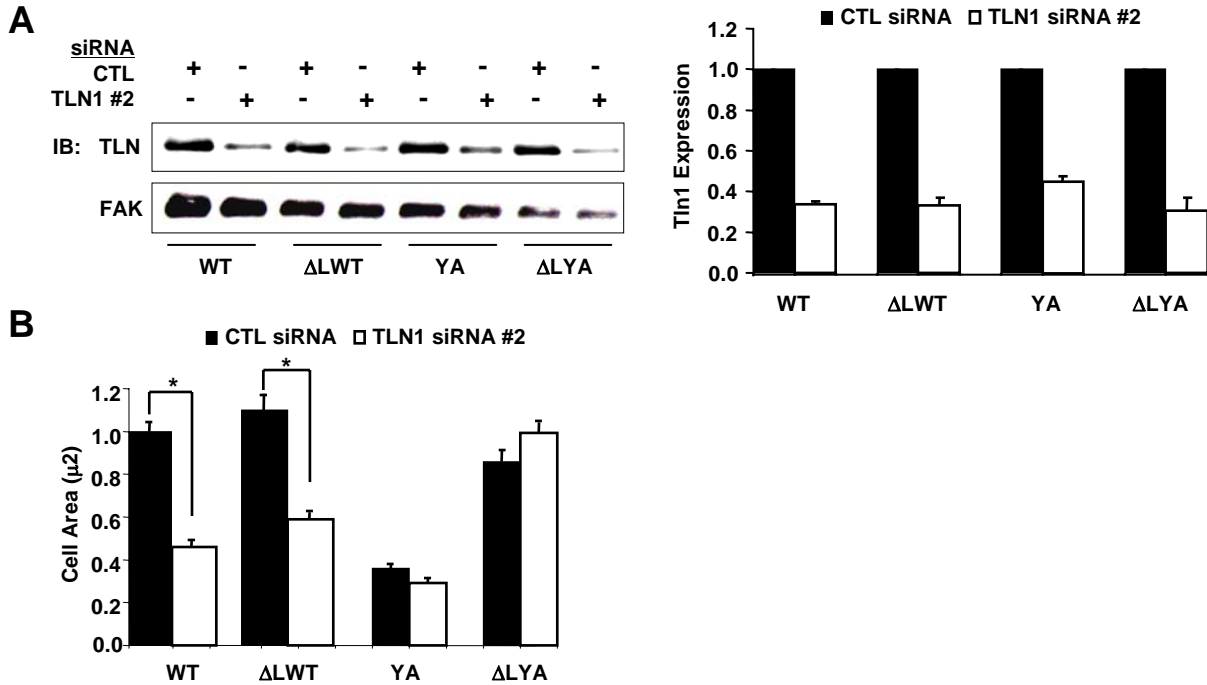

**Fig. S3. A second talin1 siRNA similarly affects integrin function.** (A-B) CHO K1 cells were transiently transfected with control or talin1 siRNA #2 for 48 hours, and then co-transfected for 24 hours with expression vectors for the indicated integrin subunits: WT ( $\alpha$ IIb-5 &  $\beta$ 3-1AWT); YA ( $\alpha$ IIb-5 &  $\beta$ 3-1AYA);  $\Delta$ LWT ( $\alpha$ IIb- $\Delta$ L &  $\beta$ 3-1AWT); and  $\Delta$ LYA ( $\alpha$ IIb- $\Delta$ L &  $\beta$ 3-1A YA). Aliquots of transfected cells were assayed for talin1 knockdown or adhered to fibrinogen for 1 hour in CCM1 to assay spreading. (A) Talin knockdown was analyzed by western blotting; shown is a representative western blot, and the average expression levels of talin1  $\pm$  s.d. is plotted from 3 independent experiments. (B) Plotted is the average cell area  $\pm$  s.d. from the 3 independent experiments shown in A, n=150. (\*) p<0.05.
