# Supplementary material
Source: PubMed Central journal article supplement (PMC2848110)
Supplement: jcs.056549_4.pdf [file jcs.056549_4.pdf]

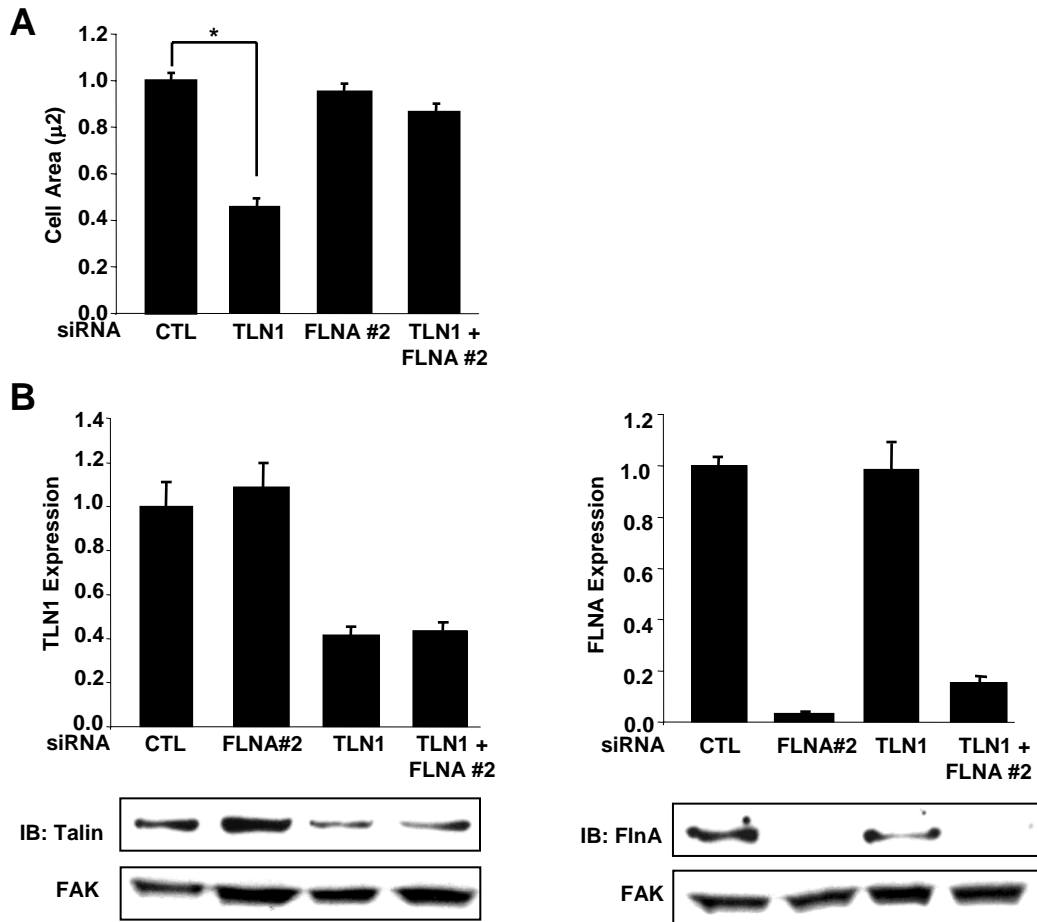

**Fig. S4. A second FLNa siRNA similarly affects integrin function.** (A-B) CHO K1 cells were transiently transfected with control siRNA, talin1 siRNA #1, FLNa siRNA #2 or with both talin1 and FLNa siRNAs for 48 hours and then co-transfected for 24 hours with expression vectors for the  $\alpha$ IIb- $\Delta$ L and  $\beta$ 3-1AWT integrin subunits. Aliquots of transfected cells were used to confirm talin1 knockdown and to assay spreading after cells were replated on fibrinogen for 1 hour in CCM1. (A) Plotted is the average cell area  $\pm$  s.d. from 3 independent experiments,  $n=150$ . (\*)  $p<0.05$ . (B) Talin1 and FLNa knockdown were confirmed by western blotting. Plotted are the average expression levels for talin1 (left) and FLNa (right)  $\pm$  s.d. from the 3 independent experiments shown in A, together with representative western blots.
