# Supplementary material
Source: PubMed Central journal article supplement (PMC2848110)
Supplement: jcs.056549_6.pdf [file jcs.056549_6.pdf]

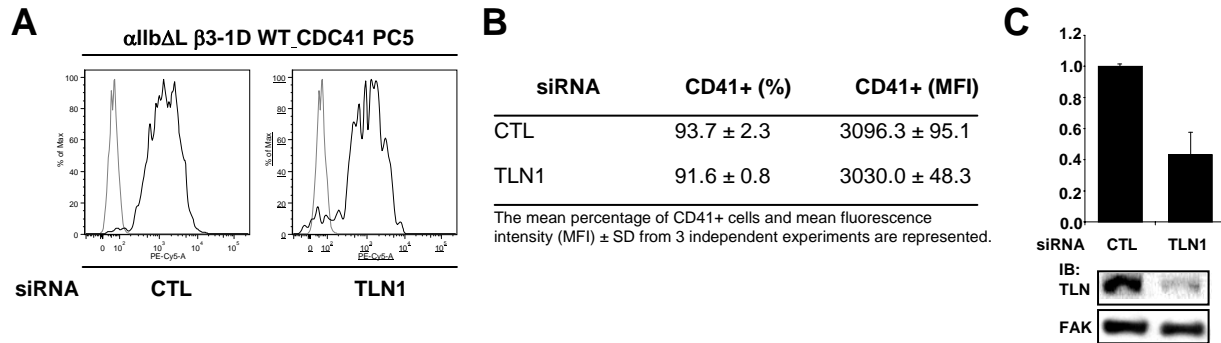

**Fig. S6. Depletion of talin1 siRNA does not alter the surface expression of  $\alpha$ IIb- $\Delta$ L  $\beta$ 3-1D WT integrin.** (A-C) CHO K1 cells were transiently transfected with control or talin1 siRNA for 48 hours and then co-transfected for 24 hours with expression vectors for the  $\alpha$ IIb- $\Delta$ L and  $\beta$ 3-1D WT integrin subunits. Transfected cells were replated on fibrinogen for 1 hour in CCM1 and then collected to assay integrin expression and talin knockdown. (A-B) FACS analysis using an antibody to CD41 (PC5), which recognizes the  $\alpha$ IIb- $\beta$ 3 extracellular complex, indicated that recombinant integrin expression was not altered by depleting cells of talin1 and that adhering transiently transfected cells to fibrinogen enriches for cells expressing the chimeric integrin. Data represents the percentage (%) and mean fluorescence intensity (MFI) for each condition. (C) Talin1 knockdown in replated cells was confirmed by western blotting. Plotted are the average expression levels for talin1  $\pm$  s.d. from the 3 independent experiments shown in A, together with representative western blots. Effects on spreading were similar to those presented in Fig. 5 (data not shown).
